# Supplementary material for: Nuclear quantum effects in gas-phase ethylene glycol
Source: Royal Society of Chemistry journal article supplement (doi:10.1039/d4cp00700j), 2024-01-01
Supplement: d4cp00700j1.pdf [file d4cp00700j1.pdf]

## Supplementary Material: Nuclear Quantum Effects in Gas-Phase Ethylene Glycol

Mrinal Arandhara and Sai G. Ramesh\*

*Department of Inorganic and Physical Chemistry, Indian Institute of Science, Bangalore 560012*

TABLE S-1. Ab initio energies at the local minima and TS geometries of EG at various levels of theory.

|                         | tG <sup>+</sup> g <sup>-</sup> | g <sup>+</sup> G <sup>+</sup> g <sup>-</sup> | g <sup>-</sup> G <sup>+</sup> g <sup>-</sup> | tTt   | g <sup>+</sup> Tg <sup>-</sup> | tTg <sup>+</sup> | g <sup>+</sup> Tg <sup>+</sup> | tG <sup>+</sup> t | tG <sup>+</sup> g <sup>+</sup> | cCt    |
|-------------------------|--------------------------------|----------------------------------------------|----------------------------------------------|-------|--------------------------------|------------------|--------------------------------|-------------------|--------------------------------|--------|
| MP2/aVDZ                | 0.0                            | 149.8                                        | 357.4                                        | 900.8 | 984.4                          | 972.4            | 1045.4                         | 1091.9            | 1240.7                         | 2427.1 |
| CCSD(T)/aVDZ//MP2/aVDZ  | 0.0                            | 111.6                                        | 304.5                                        | 877.3 | 907.0                          | 918.8            | 966.7                          | 1094.6            | 1210.9                         | 2323.7 |
| MP2/aVTZ                | 0.0                            | 148.9                                        | 330.2                                        | 912.1 | 979.0                          | 971.0            | 1045.9                         | 1084.2            | 1248.6                         | 2298.3 |
| CCSD/aVDZ               | 0.0                            | 142.9                                        | 322.2                                        | 819.0 | 904.3                          | 888.8            | 970.2                          | 1065.8            | 1200.9                         | 2352.3 |
| CCSD(T)/aVDZ//CCSD/aVDZ | 0.0                            | 112.8                                        | 304.8                                        | 876.1 | 907.9                          | 918.5            | 967.6                          | 1092.9            | 1209.9                         | 2323.7 |

TABLE S-2. Energies and geometries of stationary points of EG at the MP2/aVTZ level of theory. See also Table 1 in the main manuscript. All bond lengths are in Å while all angles and dihedrals are in degrees. Equivalent structures that have the same energy are obtained by the transformations  $(\phi_1, \phi_2, \phi_3) \rightarrow (-\phi_1, -\phi_2, -\phi_3)$  and  $(\phi_1, \phi_2, \phi_3) \rightarrow (\phi_1, \phi_3, \phi_2)$  with attendant changes in internals, some of which remain the same and others are exchanged.

|                |                                                     | tG <sup>+</sup> g <sup>-</sup>                                                                       | g <sup>+</sup> G <sup>+</sup> g <sup>-</sup>                                                                                                 | g <sup>-</sup> G <sup>+</sup> g <sup>-</sup> | tTt    | g <sup>+</sup> Tg <sup>-</sup> | tTg <sup>+</sup>                                           | g <sup>+</sup> Tg <sup>+</sup> | tG <sup>+</sup> t | tG <sup>+</sup> g <sup>+</sup>                                                                       | cCt    |
|----------------|-----------------------------------------------------|------------------------------------------------------------------------------------------------------|----------------------------------------------------------------------------------------------------------------------------------------------|----------------------------------------------|--------|--------------------------------|------------------------------------------------------------|--------------------------------|-------------------|------------------------------------------------------------------------------------------------------|--------|
| $\phi_1$       | $\phi(\text{O}_3\text{C}_1\text{C}_2\text{O}_4)$    | 62.15                                                                                                | 57.68                                                                                                                                        | 60.53                                        | 180.0  | 180.0                          | 179.65                                                     | 176.66                         | 73.93             | 65.30                                                                                                | 0.0    |
| $\phi_2$       | $\phi(\text{H}_9\text{O}_3\text{C}_1\text{C}_2)$    | -168.65                                                                                              | 73.91                                                                                                                                        | -80.11                                       | 180.0  | 70.63                          | -175.90                                                    | 67.26                          | -168.17           | -178.37                                                                                              | 0.0    |
| $\phi_3$       | $\phi(\text{H}_{10}\text{O}_4\text{C}_2\text{C}_1)$ | -51.97                                                                                               | -44.88                                                                                                                                       | -80.11                                       | 180.0  | -70.63                         | 71.91                                                      | 67.26                          | -168.17           | 59.51                                                                                                | 180.0  |
| $E$            |                                                     | 0.00                                                                                                 | 148.9                                                                                                                                        | 330.2                                        | 912.1  | 979.0                          | 971.0                                                      | 1045.9                         | 1084.2            | 1248.6                                                                                               | 2298.3 |
| $R_1$          | $r(\text{C}_2\text{C}_1)$                           | 1.5087                                                                                               | 1.5125                                                                                                                                       | 1.5128                                       | 1.5102 | 1.5195                         | 1.5151                                                     | 1.5192                         | 1.5052            | 1.5104                                                                                               | 1.5488 |
| $R_2$          | $r(\text{O}_3\text{C}_1)$                           | 1.4303                                                                                               | 1.4305                                                                                                                                       | 1.4260                                       | 1.4249 | 1.4235                         | 1.4243                                                     | 1.4226                         | 1.4235            | 1.4206                                                                                               | 1.4163 |
| $R_3$          | $r(\text{O}_4\text{C}_2)$                           | 1.4187                                                                                               | 1.4175                                                                                                                                       | 1.4260                                       | 1.4249 | 1.4235                         | 1.4233                                                     | 1.4226                         | 1.4235            | 1.4197                                                                                               | 1.4287 |
| $R_4$          | $r(\text{H}_5\text{C}_2)$                           | 1.0942                                                                                               | 1.0970                                                                                                                                       | 1.0923                                       | 1.0923 | 1.0924                         | 1.0877                                                     | 1.0877                         | 1.0927            | 1.0885                                                                                               | 1.0907 |
| $R_5$          | $r(\text{H}_6\text{C}_2)$                           | 1.0888                                                                                               | 1.0898                                                                                                                                       | 1.0899                                       | 1.0923 | 1.0901                         | 1.0923                                                     | 1.0956                         | 1.0943            | 1.0950                                                                                               | 1.0907 |
| $R_6$          | $r(\text{H}_7\text{C}_1)$                           | 1.0935                                                                                               | 1.0930                                                                                                                                       | 1.0899                                       | 1.0923 | 1.0924                         | 1.0953                                                     | 1.0956                         | 1.0943            | 1.0953                                                                                               | 1.0908 |
| $R_7$          | $r(\text{H}_8\text{C}_1)$                           | 1.0922                                                                                               | 1.0882                                                                                                                                       | 1.0923                                       | 1.0923 | 1.0901                         | 1.0922                                                     | 1.0877                         | 1.0927            | 1.0964                                                                                               | 1.0908 |
| $R_8$          | $r(\text{H}_9\text{O}_3)$                           | 0.9616                                                                                               | 0.9633                                                                                                                                       | 0.9623                                       | 0.9615 | 0.9625                         | 0.9617                                                     | 0.9627                         | 0.9614            | 0.9619                                                                                               | 0.9663 |
| $R_9$          | $r(\text{H}_{10}\text{O}_4)$                        | 0.9651                                                                                               | 0.9659                                                                                                                                       | 0.9623                                       | 0.9615 | 0.9625                         | 0.9623                                                     | 0.9627                         | 0.9614            | 0.9627                                                                                               | 0.9613 |
| $R_{10}$       | $\theta(\text{O}_3\text{C}_1\text{C}_2)$            | 106.0                                                                                                | 110.5                                                                                                                                        | 111.3                                        | 106.5  | 111.6                          | 106.7                                                      | 111.7                          | 108.3             | 108.6                                                                                                | 113.2  |
| $R_{11}$       | $\theta(\text{O}_4\text{C}_2\text{C}_1)$            | 111.3                                                                                                | 111.1                                                                                                                                        | 111.3                                        | 106.5  | 111.6                          | 111.3                                                      | 111.7                          | 108.3             | 113.7                                                                                                | 107.9  |
| $R_{12}$       | $\theta(\text{H}_5\text{C}_2\text{C}_1)$            | 109.1                                                                                                | 109.6                                                                                                                                        | 109.7                                        | 109.3  | 109.6                          | 109.5                                                      | 109.5                          | 108.6             | 109.1                                                                                                | 110.2  |
| $R_{13}$       | $\theta(\text{H}_6\text{C}_2\text{C}_1)$            | 109.9                                                                                                | 110.2                                                                                                                                        | 109.8                                        | 109.3  | 109.9                          | 109.6                                                      | 110.0                          | 108.9             | 108.6                                                                                                | 110.2  |
| $R_{14}$       | $\theta(\text{H}_7\text{C}_1\text{C}_2)$            | 110.1                                                                                                | 110.7                                                                                                                                        | 109.8                                        | 109.3  | 109.6                          | 109.6                                                      | 110.0                          | 108.9             | 108.4                                                                                                | 109.3  |
| $R_{15}$       | $\theta(\text{H}_8\text{C}_1\text{C}_2)$            | 109.6                                                                                                | 109.8                                                                                                                                        | 109.7                                        | 109.3  | 109.9                          | 109.3                                                      | 109.5                          | 108.6             | 109.5                                                                                                | 109.3  |
| $R_{16}$       | $\theta(\text{H}_9\text{O}_3\text{C}_1)$            | 108.8                                                                                                | 108.0                                                                                                                                        | 107.2                                        | 108.3  | 108.1                          | 108.5                                                      | 108.2                          | 108.5             | 108.4                                                                                                | 106.6  |
| $R_{17}$       | $\phi(\text{H}_{10}\text{O}_4\text{C}_2)$           | 105.9                                                                                                | 105.9                                                                                                                                        | 107.2                                        | 108.3  | 108.1                          | 108.1                                                      | 108.2                          | 108.5             | 108.1                                                                                                | 108.7  |
| $R_{18}$       | $\phi(\text{H}_5\text{C}_2\text{C}_1\text{O}_4)$    | -122.7                                                                                               | -122.6                                                                                                                                       | -122.9                                       | -120.6 | -124.5                         | -117.4                                                     | -117.6                         | -121.1            | -117.7                                                                                               | -120.1 |
| $R_{19}$       | $\phi(\text{H}_6\text{C}_2\text{C}_1\text{O}_4)$    | 118.3                                                                                                | 118.6                                                                                                                                        | 117.9                                        | 120.6  | 117.1                          | 124.2                                                      | 124.1                          | 120.5             | 124.4                                                                                                | 120.1  |
| $R_{20}$       | $\phi(\text{H}_7\text{C}_1\text{C}_2\text{O}_3)$    | 120.1                                                                                                | 123.8                                                                                                                                        | 117.9                                        | 120.6  | 124.5                          | 120.4                                                      | 124.1                          | 120.5             | 120.9                                                                                                | 121.1  |
| $R_{21}$       | $\phi(\text{H}_8\text{C}_1\text{C}_2\text{O}_3)$    | -119.5                                                                                               | -115.9                                                                                                                                       | -122.9                                       | -120.6 | -117.1                         | -121.1                                                     | -117.6                         | -121.0            | -121.4                                                                                               | -121.1 |
| Equiv. struct. |                                                     | tG <sup>-</sup> g <sup>+</sup><br>g <sup>+</sup> G <sup>-</sup> t<br>g <sup>-</sup> G <sup>+</sup> t | g <sup>-</sup> G <sup>-</sup> g <sup>+</sup><br>g <sup>+</sup> G <sup>-</sup> g <sup>-</sup><br>g <sup>-</sup> G <sup>+</sup> g <sup>+</sup> | g <sup>+</sup> G <sup>-</sup> g <sup>+</sup> |        | g <sup>-</sup> Tg <sup>+</sup> | tTg <sup>-</sup><br>g <sup>-</sup> Tt<br>g <sup>+</sup> Tt | g <sup>-</sup> Tg <sup>-</sup> | tG <sup>-</sup> t | tG <sup>-</sup> g <sup>-</sup><br>g <sup>-</sup> G <sup>-</sup> t<br>g <sup>+</sup> G <sup>+</sup> t | tCc    |

\* Corresponding author. Emails: (MA) mrrinala@iisc.ac.in; (SGR) sairamesh@iisc.ac.in

TABLE S-3. Normal mode frequencies of EG, computed at the minima with the MP2/aug-cc-pVTZ level of theory.

| NM            | tG <sup>+</sup> g <sup>-</sup> | g <sup>+</sup> G <sup>+</sup> g <sup>-</sup> | g <sup>-</sup> G <sup>+</sup> g <sup>-</sup> | tTt    | g <sup>+</sup> Tg <sup>-</sup> | tTg <sup>+</sup> | g <sup>+</sup> Tg <sup>+</sup> | tG <sup>+</sup> t | tG <sup>+</sup> g <sup>+</sup> | cCt            |
|---------------|--------------------------------|----------------------------------------------|----------------------------------------------|--------|--------------------------------|------------------|--------------------------------|-------------------|--------------------------------|----------------|
| $\phi_1$      | 62.15                          | 57.68                                        | 60.53                                        | 180.0  | 180.0                          | 179.65           | 176.66                         | 73.93             | 65.30                          | 0.0            |
| $\phi_2$      | -168.65                        | 73.91                                        | -80.11                                       | 180.0  | 70.63                          | -175.90          | 67.26                          | -168.17           | -178.37                        | 0.0            |
| $\phi_3$      | -51.97                         | -44.88                                       | -80.11                                       | 180.0  | -70.63                         | 71.91            | 67.26                          | -168.17           | 59.51                          | 180.0          |
| $\omega_1$    | 168.4                          | 167.8                                        | 99.8                                         | 115.9  | 141.0                          | 129.4            | 145.0                          | 152.1             | 132.8                          | <i>i</i> 238.6 |
| $\omega_2$    | 247.2                          | 292.1                                        | 158.9                                        | 216.5  | 250.1                          | 227.9            | 250.0                          | 185.5             | 227.2                          | <i>i</i> 27.1  |
| $\omega_3$    | 328.6                          | 326.8                                        | 320.9                                        | 230.0  | 268.1                          | 262.3            | 264.2                          | 192.6             | 238.0                          | 323.9          |
| $\omega_4$    | 419.5                          | 452.0                                        | 428.1                                        | 291.0  | 295.9                          | 293.3            | 304.9                          | 337.5             | 331.8                          | 345.7          |
| $\omega_5$    | 523.2                          | 535.5                                        | 527.5                                        | 481.4  | 475.2                          | 478.8            | 475.6                          | 495.4             | 509.8                          | 612.7          |
| $\omega_6$    | 886.9                          | 877.8                                        | 880.7                                        | 838.9  | 802.5                          | 820.4            | 804.4                          | 900.7             | 886.2                          | 871.9          |
| $\omega_7$    | 903.8                          | 897.4                                        | 885.4                                        | 1008.9 | 1026.5                         | 1022.1           | 1042.8                         | 915.9             | 900.2                          | 899.0          |
| $\omega_8$    | 1065.9                         | 1059.4                                       | 1051.2                                       | 1076.3 | 1073.8                         | 1079.8           | 1048.5                         | 1058.8            | 1058.3                         | 1087.2         |
| $\omega_9$    | 1099.6                         | 1073.4                                       | 1063.3                                       | 1094.0 | 1090.4                         | 1082.4           | 1091.2                         | 1100.9            | 1097.1                         | 1106.9         |
| $\omega_{10}$ | 1129.5                         | 1122.0                                       | 1126.1                                       | 1167.0 | 1109.2                         | 1104.4           | 1109.2                         | 1127.0            | 1131.3                         | 1159.9         |
| $\omega_{11}$ | 1178.4                         | 1203.7                                       | 1197.7                                       | 1190.0 | 1140.4                         | 1213.1           | 1158.3                         | 1215.8            | 1195.9                         | 1213.0         |
| $\omega_{12}$ | 1268.8                         | 1245.8                                       | 1257.4                                       | 1235.1 | 1319.7                         | 1240.3           | 1303.9                         | 1257.0            | 1253.4                         | 1280.6         |
| $\omega_{13}$ | 1296.3                         | 1373.8                                       | 1383.0                                       | 1288.0 | 1339.2                         | 1321.4           | 1347.5                         | 1298.0            | 1322.1                         | 1301.3         |
| $\omega_{14}$ | 1384.4                         | 1377.3                                       | 1388.5                                       | 1319.2 | 1370.1                         | 1367.9           | 1385.7                         | 1329.6            | 1381.5                         | 1331.1         |
| $\omega_{15}$ | 1419.9                         | 1405.6                                       | 1404.0                                       | 1409.3 | 1404.2                         | 1393.1           | 1387.7                         | 1429.2            | 1419.1                         | 1442.3         |
| $\omega_{16}$ | 1454.8                         | 1435.4                                       | 1421.7                                       | 1486.5 | 1432.8                         | 1462.3           | 1432.8                         | 1482.8            | 1461.7                         | 1465.3         |
| $\omega_{17}$ | 1515.5                         | 1511.5                                       | 1508.2                                       | 1541.0 | 1521.2                         | 1529.3           | 1521.2                         | 1519.3            | 1509.7                         | 1542.9         |
| $\omega_{18}$ | 1523.5                         | 1520.9                                       | 1512.1                                       | 1550.7 | 1534.9                         | 1543.3           | 1534.7                         | 1520.0            | 1523.4                         | 1563.8         |
| $\omega_{19}$ | 3053.1                         | 3026.2                                       | 3070.6                                       | 3056.8 | 3067.1                         | 3037.6           | 3040.8                         | 3040.6            | 3021.7                         | 3064.8         |
| $\omega_{20}$ | 3058.1                         | 3069.9                                       | 3073.5                                       | 3063.6 | 3075.7                         | 3076.5           | 3042.5                         | 3050.3            | 3049.9                         | 3076.4         |
| $\omega_{21}$ | 3114.1                         | 3133.7                                       | 3139.9                                       | 3101.9 | 3124.2                         | 3102.2           | 3149.7                         | 3098.2            | 3073.9                         | 3101.8         |
| $\omega_{22}$ | 3149.4                         | 3158.8                                       | 3147.8                                       | 3127.3 | 3149.6                         | 3163.5           | 3166.0                         | 3110.0            | 3152.0                         | 3131.2         |
| $\omega_{23}$ | 3808.1                         | 3793.7                                       | 3845.0                                       | 3857.2 | 3840.3                         | 3843.8           | 3837.9                         | 3855.4            | 3836.4                         | 3771.3         |
| $\omega_{24}$ | 3855.6                         | 3830.5                                       | 3846.4                                       | 3858.0 | 3841.7                         | 3854.5           | 3839.0                         | 3855.4            | 3850.1                         | 3863.6         |

**Symmetry-adapted Fourier expansions in  $\phi_1, \phi_2, \phi_3$  space:**

$$\begin{aligned}
Y^{(es)}(\phi_1, \phi_2, \phi_3) = & \sum_{m \geq 0}^M \sum_{n \geq 0}^N A_{mn}^{(es,1)} \cos(m\phi_1) \cos(n\phi_2) \cos(n\phi_3) \\
& + \sum_{m \geq 0}^M \sum_{n \geq 0}^N \sum_{l \geq 0}^{n-1} A_{mnl}^{(es,2)} \cos(m\phi_1) [\cos(n\phi_2) \cos(l\phi_3) + \cos(l\phi_2) \cos(n\phi_3)] \\
& + \sum_{m \geq 0}^M \sum_{n > 0}^N A_{mn}^{(es,3)} \cos(m\phi_1) \sin(n\phi_2) \sin(n\phi_3) \\
& + \sum_{m \geq 0}^M \sum_{n > 0}^N \sum_{l > 0}^{n-1} A_{mnl}^{(es,4)} \cos(m\phi_1) [\sin(n\phi_2) \sin(l\phi_3) + \sin(l\phi_2) \sin(n\phi_3)] \\
& + \sum_{m > 0}^M \sum_{n \geq 0}^N \sum_{l > 0}^N A_{mnl}^{(es,5)} \sin(m\phi_1) [\cos(n\phi_2) \sin(l\phi_3) + \sin(l\phi_2) \cos(n\phi_3)],
\end{aligned} \tag{S1a}$$

$$\begin{aligned}
Y^{(ea)}(\phi_1, \phi_2, \phi_3) = & \sum_{m \geq 0}^M \sum_{n > 0}^N \sum_{l \geq 0}^{n-1} A_{mnl}^{(ea,1)} \cos(m\phi_1) [\cos(n\phi_2) \cos(l\phi_3) - \cos(l\phi_2) \cos(n\phi_3)] \\
& + \sum_{m \geq 0}^M \sum_{n > 1}^N \sum_{l > 0}^{n-1} A_{mnl}^{(ea,2)} \cos(m\phi_1) [\sin(n\phi_2) \sin(l\phi_3) - \sin(l\phi_2) \sin(n\phi_3)] \\
& + \sum_{m > 0}^M \sum_{n \geq 0}^N \sum_{l > 0}^N A_{mnl}^{(ea,3)} \sin(m\phi_1) [\cos(n\phi_2) \sin(l\phi_3) - \sin(l\phi_2) \cos(n\phi_3)],
\end{aligned} \tag{S1b}$$

$$\begin{aligned}
Y^{(os)}(\phi_1, \phi_2, \phi_3) = & \sum_{m > 0}^M \sum_{n \geq 0}^N f_{mnl}^{(os,1)} \sin(m\phi_1) \cos(n\phi_2) \cos(n\phi_3) \\
& + \sum_{m > 0}^M \sum_{n \geq 0}^N \sum_{l \geq 0}^{n-1} f_{mnl}^{(os,2)} \sin(m\phi_1) [\cos(n\phi_2) \cos(l\phi_3) + \cos(l\phi_2) \cos(n\phi_3)] \\
& + \sum_{m > 0}^M \sum_{n > 0}^N f_{mnl}^{(os,3)} \sin(m\phi_1) \sin(n\phi_2) \sin(n\phi_3) \\
& + \sum_{m > 0}^M \sum_{n > 0}^N \sum_{l > 0}^{n-1} f_{mnl}^{(os,4)} \sin(m\phi_1) [\sin(n\phi_2) \sin(l\phi_3) + \sin(l\phi_2) \sin(n\phi_3)] \\
& + \sum_{m \geq 0}^M \sum_{n \geq 0}^N \sum_{l > 0}^N f_{mnl}^{(os,5)} \cos(m\phi_1) [\cos(n\phi_2) \sin(l\phi_3) + \sin(l\phi_2) \cos(n\phi_3)],
\end{aligned} \tag{S1c}$$

$$\begin{aligned}
Y^{(oa)}(\phi_1, \phi_2, \phi_3) = & \sum_{m > 0}^M \sum_{n > 0}^N \sum_{l \geq 0}^{n-1} f_{mnl}^{(oa,1)} \sin(m\phi_1) [\cos(n\phi_2) \cos(l\phi_3) - \cos(l\phi_2) \cos(n\phi_3)] \\
& + \sum_{m > 0}^M \sum_{n > 1}^N \sum_{l > 0}^{n-1} f_{mnl}^{(oa,2)} \sin(m\phi_1) [\sin(n\phi_2) \sin(l\phi_3) - \sin(l\phi_2) \sin(n\phi_3)] \\
& + \sum_{m \geq 0}^M \sum_{n \geq 0}^N \sum_{l > 0}^N f_{mnl}^{(oa,3)} \cos(m\phi_1) [\cos(n\phi_2) \sin(l\phi_3) - \sin(l\phi_2) \cos(n\phi_3)].
\end{aligned} \tag{S1d}$$

TABLE S-4. Definitions of the symmetrized internal coordinates of EG.

| Coord.   | Definition                   | Sym. | Coord.   | Definition                              | Sym. |
|----------|------------------------------|------|----------|-----------------------------------------|------|
| $S_1$    | $R_1$                        | es   | $S_{12}$ | $(R_{12} + R_{13} + R_{14} + R_{15})/2$ | es   |
| $S_2$    | $(R_2 + R_3)/\sqrt{2}$       | es   | $S_{13}$ | $(R_{12} - R_{13} + R_{14} - R_{15})/2$ | oa   |
| $S_3$    | $(R_2 - R_3)/\sqrt{2}$       | ea   | $S_{14}$ | $(R_{12} - R_{13} - R_{14} + R_{15})/2$ | os   |
| $S_4$    | $(R_4 + R_5 + R_6 + R_7)/2$  | es   | $S_{15}$ | $(R_{12} + R_{13} - R_{14} - R_{15})/2$ | ea   |
| $S_5$    | $(R_4 - R_5 + R_6 - R_7)/2$  | oa   | $S_{16}$ | $(R_{16} + R_{17})/\sqrt{2}$            | es   |
| $S_6$    | $(R_4 - R_5 - R_6 + R_7)/2$  | os   | $S_{17}$ | $(R_{16} - R_{17})/\sqrt{2}$            | ea   |
| $S_7$    | $(R_4 + R_5 - R_6 - R_7)/2$  | ea   | $S_{18}$ | $(R_{18} + R_{19} + R_{20} + R_{21})/2$ | os   |
| $S_8$    | $(R_8 + R_9)/\sqrt{2}$       | es   | $S_{19}$ | $(R_{18} - R_{19} + R_{20} - R_{21})/2$ | ea   |
| $S_9$    | $(R_8 - R_9)/\sqrt{2}$       | ea   | $S_{20}$ | $(R_{18} - R_{19} - R_{20} + R_{21})/2$ | es   |
| $S_{10}$ | $(R_{10} + R_{11})/\sqrt{2}$ | es   | $S_{21}$ | $(R_{18} + R_{19} - R_{20} - R_{21})/2$ | oa   |
| $S_{11}$ | $(R_{10} - R_{11})/\sqrt{2}$ | ea   |          |                                         |      |

TABLE S-5. Ranges of one-dimensional displacements along bonds ( $R_1$ - $R_9$ , in Å) and angles ( $R_{10}$ - $R_{17}$ , in degrees) from the reaction surface towards the calculation of quintic up to octic force constants.

| Bonds | $R_{min}$ | $R_{max}$ | $\delta R$ | Angles <sup>a,b</sup> | $R_{min}$ | $R_{max}$ | $\delta R$ |
|-------|-----------|-----------|------------|-----------------------|-----------|-----------|------------|
| $R_1$ | -0.225    | 0.300     | 0.025      | $R_{10}$              | -17.5     | 30.0      | 2.5        |
| $R_2$ | -0.225    | 0.250     | 0.025      | $R_{11}$              | -25.0     | 22.5      | 2.5        |
| $R_3$ | -0.225    | 0.275     | 0.025      | $R_{12}$              | -32.0     | 40.0      | 4.0        |
| $R_4$ | -0.320    | 0.400     | 0.040      | $R_{13}$              | -32.0     | 40.0      | 4.0        |
| $R_5$ | -0.320    | 0.400     | 0.040      | $R_{14}$              | -36.0     | 36.0      | 4.0        |
| $R_6$ | -0.320    | 0.400     | 0.040      | $R_{15}$              | -36.0     | 36.0      | 4.0        |
| $R_7$ | -0.320    | 0.400     | 0.040      | $R_{16}$              | -40.0     | 40.0      | 4.0        |
| $R_8$ | -0.280    | 0.400     | 0.040      | $R_{17}$              | -36.0     | 40.0      | 4.0        |
| $R_9$ | -0.280    | 0.400     | 0.040      |                       |           |           |            |

<sup>a</sup> For  $R_{10}$  and  $R_{10}$ , at some points in  $(\phi_1, \phi_2, \phi_3)$  space, the above ranges gave poorer fits. Hence the ranges were slightly reduced from both ends by the removal of 3 points in total.

<sup>b</sup> For  $R_{12}$ - $R_{15}$ , selected dihedral points were excluded due to high energies resulting from the displacement.

TABLE S-6. Root mean square errors for fits of optimal values of symmetrized internals  $S_j^\circ$  on the reaction surface. Based on the mode symmetries (Table S-4), the appropriate symmetry-adapted expressions from Eqs. (S1a)-(S1d) were used. In all cases,  $(M, N) = (9, 7)$  was used.

| Bonds       | RMSE<br>(Å, $\times 10^{-5}$ ) | Angles         | RMSE<br>(°, $\times 10^{-3}$ ) | Dihedrals      | RMSE<br>(°, $\times 10^{-3}$ ) |
|-------------|--------------------------------|----------------|--------------------------------|----------------|--------------------------------|
| $S_1^\circ$ | 0.71                           | $S_{10}^\circ$ | 4.86                           | $S_{18}^\circ$ | 1.59                           |
| $S_2^\circ$ | 0.77                           | $S_{11}^\circ$ | 0.70                           | $S_{19}^\circ$ | 0.95                           |
| $S_3^\circ$ | 1.00                           | $S_{12}^\circ$ | 1.99                           | $S_{20}^\circ$ | 2.24                           |
| $S_4^\circ$ | 0.16                           | $S_{13}^\circ$ | 0.70                           | $S_{21}^\circ$ | 0.86                           |
| $S_5^\circ$ | 0.10                           | $S_{14}^\circ$ | 1.69                           |                |                                |
| $S_6^\circ$ | 0.14                           | $S_{15}^\circ$ | 0.82                           |                |                                |
| $S_7^\circ$ | 0.19                           | $S_{16}^\circ$ | 4.18                           |                |                                |
| $S_8^\circ$ | 1.67                           | $S_{17}^\circ$ | 2.75                           |                |                                |
| $S_9^\circ$ | 1.43                           |                |                                |                |                                |

## S1. GENERATION OF THE SET OF TEST DATA POINTS FOR ETHYLENE GLYCOL

As a test of the quality of the potential surface, we have compared the energies and forces obtained from our PES with ab initio values at the MP2/aVTZ level of theory at 15150 geometries. These were sampled from a combination of methods as follows.

1. Sampling from the quantum harmonic distribution, as discussed by Brown.<sup>1</sup> This is used at each of the 9 minima as well as the cCt and cCc geometries. For the last two, the magnitudes of the imaginary frequencies were considered for sampling purposes. Using control parameters  $A$  with values of 0.5, 1, and 2, we have obtained 1000 points per region, i.e. a total of 11000 points. Care was taken that internal variables are sampled sufficiently widely but not over-extended and also that no two geometries are too close to each other, as measured by the ‘distance’ in bond-angle-dihedral space. As also used in our recent study on 2-fluoroethanol,<sup>2</sup> vectors are composed of bond distances, angles and dihedrals for each geometry. Magnitudes of difference vectors between each pair of points are calculated. Denoting these as  $l_b$ ,  $l_a$  and  $l_d$  for a pair of geometries, it was ensured for the 11000 points selected that at least two of the following criteria were satisfied:  $l_b > 0.2 \text{ \AA}$ ,  $l_b > 5^\circ$  and  $l_d > 15^\circ$ . As this approach yields points near the stationary points, subsequent sampling was focused on regions away from such points.
2. PIMD trajectories at 300 K with the auxiliary MP2/aVDZ PES including up to octic order terms. Data are sampled from selected beads along a 2 ns trajectory every 50 fs. The collected geometries are filtered based on the bond-angle-dihedral proximity criteria. From the geometries that remained, points were sampled based on values in  $\phi_1$  and  $\phi_2$  (note that  $\phi_3$  was not specially considered owing to its formal equivalence to  $\phi_2$ ). (a) 500 points were sampled for  $\phi_1$  in the range  $[0^\circ, 40^\circ]$  and  $[80^\circ, 100^\circ]$  and without restriction on  $\phi_2$ . (b) For  $\phi_1$  outside this range, 500 points were sampled for  $\phi_2$  in the ranges  $[-130^\circ, -95^\circ]$  and  $[-15^\circ, 30^\circ]$ . (c) 1000 points in the rest of the  $\phi_2$  space with  $\phi_1$  again outside the ranges given in (a). The sample sizes in these regions reflect the density of filtered points. A total of 2000 points were obtained from this approach.
3. Geometries from path integral umbrella sampling simulations along  $\phi_1$  using 16 beads at 300 K. Windows of  $10^\circ$  width, except in the ranges  $40^\circ$ - $90^\circ$  and  $160^\circ$ - $180^\circ$  were considered. From most windows and after due proximity filtering, 200 points were taken, except fewer ones from bins closest to the excluded areas. A total of 1850 points were sampled in this manner. In addition, points for  $\phi_1 \in [145^\circ, 180^\circ]$  and  $\phi_2 \in [-135^\circ, 25^\circ]$  (200 points) and  $\in [105^\circ, 140^\circ]$  (100 points) were added to cover regions missed by the above sampling. In this manner, a total of 2150 test points were obtained from PI-US simulations.

The distribution of these points projected onto  $(\phi_1, \phi_2)$  space is shown in Fig. 3 of the main manuscript.

## S2. CONVERGENCE OF PATH INTEGRAL SIMULATIONS WITH RESPECT TO NUMBER OF BEADS $P$

Presented in Tables S-7 and S-8 are the checks for convergence with respect to  $P$  of the simulations at 300 K and 50 K, respectively. The quantities used for the check are the estimators for the virial kinetic and potential energies as well as selected bond lengths and angles. The average virial KE and PE estimators are defined as<sup>3,4</sup>

$$\langle KE_{\text{vir}} \rangle = \frac{3Nk_B T}{2} + \left\langle \frac{1}{2P} \sum_{k=1}^P \sum_{i=1}^N \left( \mathbf{r}_i^{(k)} - \mathbf{r}_i^{(c)} \right) \cdot \frac{\partial V}{\partial \mathbf{r}_i^{(k)}} \right\rangle, \quad \text{and} \quad \langle V_{\text{vir}} \rangle = \left\langle \frac{1}{P} \sum_{k=1}^P V(\mathbf{r}_1^{(k)}, \dots, \mathbf{r}_N^{(k)}) \right\rangle,$$

where  $N$  and  $P$  are the total number of atoms and beads/replicas, respectively, while  $k_B$  is the Boltzmann constant and  $T$  is the temperature. The Cartesian coordinate of the  $k^{\text{th}}$  bead/replica of the  $i^{\text{th}}$  atom is denoted  $\mathbf{r}_i^{(k)}$ , and  $\mathbf{r}_i^c$  is the centroid Cartesian coordinate of the  $i^{\text{th}}$  atom.  $V(\mathbf{r}_1^{(k)}, \dots, \mathbf{r}_N^{(k)})$  is the potential energy of the  $k^{\text{th}}$  replica.

From the 300 K convergence checks in Table S-7, we see that  $P = 32$  is already sufficient to converge the internals while the virial estimators are also very nearly converged. The  $(P = 64, \Delta t = 0.25 \text{ fs})$  results compare well both  $(P = 64, \Delta t = 0.1 \text{ fs})$  and  $(P = 128, \Delta t = 0.1 \text{ fs})$ . This suggest that  $P = 64$  is sufficient for the path integral

TABLE S-7. Convergence tests with respect to the number of beads  $P$  and time step in PIMD simulations at 300 K.  $\langle KE_{vir} \rangle$  and  $\langle V_{vir} \rangle$  are the average virial kinetic potential energy estimators. Selected internals are also listed. Simulations for these convergence tests are all 1 ns long.

| $P$                                           |                        | 16     | 32     | 64     |        | 128    |
|-----------------------------------------------|------------------------|--------|--------|--------|--------|--------|
| $\Delta t$                                    | fs                     | 0.25   | 0.25   | 0.1    | 0.25   | 0.1    |
| $\langle KE_{vir} \rangle$                    | kcal mol <sup>-1</sup> | 18.189 | 19.434 | 19.869 | 19.735 | 19.816 |
| $\langle V_{vir} \rangle$                     | kcal mol <sup>-1</sup> | 26.362 | 27.647 | 28.078 | 27.967 | 27.977 |
| $r(\text{C}_2\text{-C}_1)$                    | Å                      | 1.5219 | 1.5225 | 1.5231 | 1.5225 | 1.5234 |
| $r(\text{O}_3\text{-C}_1)$                    | Å                      | 1.4353 | 1.4345 | 1.4340 | 1.4363 | 1.4349 |
| $r(\text{H}_9\text{-O}_3)$                    | Å                      | 0.9798 | 0.9816 | 0.9822 | 0.9811 | 0.9823 |
| $r(\text{H}_{10}\text{-O}_4)$                 | Å                      | 0.9796 | 0.9807 | 0.9833 | 0.9821 | 0.9814 |
| $\theta(\text{O}_3\text{-C}_1\text{-C}_2)$    | deg                    | 109.87 | 110.15 | 110.22 | 109.84 | 110.16 |
| $\theta(\text{H}_9\text{-O}_3\text{-C}_1)$    | deg                    | 107.58 | 107.41 | 107.47 | 107.61 | 107.23 |
| $\theta(\text{H}_{10}\text{-O}_4\text{-C}_1)$ | deg                    | 107.40 | 107.54 | 107.61 | 107.27 | 107.58 |

TABLE S-8. Convergence tests with respect to the number of beads  $P$  and time step in PIMD simulations at 50 K.  $\langle KE_{vir} \rangle$  and  $\langle V_{vir} \rangle$  are average virial kinetic and potential energy estimators. Selected internals are also listed. Simulations for these convergence tests are all 1 ns long.

| $P$                                           |                        | 16     | 32     | 64     |        | 128    |        | 256    |        |
|-----------------------------------------------|------------------------|--------|--------|--------|--------|--------|--------|--------|--------|
| $\Delta t$                                    | fs                     | 0.25   | 0.25   | 0.1    | 0.25   | 0.1    | 0.25   | 0.1    | 0.25   |
| $\langle KE_{vir} \rangle$                    | kcal mol <sup>-1</sup> | 11.942 | 17.580 | 21.961 | 21.908 | 24.059 | 24.040 | 24.894 | 24.783 |
| $\langle V_{vir} \rangle$                     | kcal mol <sup>-1</sup> | 13.406 | 19.278 | 23.805 | 23.810 | 26.031 | 26.011 | 26.837 | 26.783 |
| $r(\text{C}_2\text{-C}_1)$                    | Å                      | 1.5169 | 1.5186 | 1.5192 | 1.5192 | 1.5194 | 1.5192 | 1.5193 | 1.5203 |
| $r(\text{O}_3\text{-C}_1)$                    | Å                      | 1.4378 | 1.4396 | 1.4393 | 1.4307 | 1.4407 | 1.4383 | 1.4407 | 1.4395 |
| $r(\text{H}_9\text{-O}_3)$                    | Å                      | 0.9673 | 0.9715 | 0.9764 | 0.9766 | 0.9782 | 0.9791 | 0.9797 | 0.9794 |
| $r(\text{H}_{10}\text{-O}_4)$                 | Å                      | 0.9710 | 0.9751 | 0.9800 | 0.9787 | 0.9822 | 0.9818 | 0.9834 | 0.9836 |
| $\theta(\text{O}_3\text{-C}_1\text{-C}_2)$    | deg                    | 106.52 | 106.44 | 106.46 | 107.36 | 106.42 | 107.15 | 106.39 | 106.38 |
| $\theta(\text{H}_9\text{-O}_3\text{-C}_1)$    | deg                    | 108.81 | 108.78 | 108.82 | 108.33 | 108.74 | 108.39 | 108.72 | 108.83 |
| $\theta(\text{H}_{10}\text{-O}_4\text{-C}_1)$ | deg                    | 106.17 | 106.23 | 106.28 | 106.63 | 106.03 | 106.52 | 106.15 | 106.14 |

simulations at 300 K. Also, the convergence with respect to  $\Delta t$  indicates indirectly that the 5 times lower time step from additional Trotter factorization for the non-centroid modes (see Sec. 2.3) is adequate. Table S-8 shows that at least  $P = 128$  is required for converged results at 50 K. Once again, the similarity of the results with two time steps at both  $P = 128$  and  $P = 256$  again suggests the adequacy of the lower time step from the additional Trotter factorization for the non-centroid modes.

For the main results of the work, we have used  $P = 64$  at 300 K and  $P = 128$  at 200 K, 100 K and 50 K in the path integral simulations. The above tables suggest that these choices would yield converged results.

[1] S. E. Brown, *J. Chem. Phys.*, 2019, **151**, 194111.

[2] M. Arandhara and S. G. Ramesh, *Phys. Chem. Chem. Phys.*, 2024, **26**, 6885.

[3] M. E. Tuckerman, *Statistical Mechanics: Theory and Molecular Simulation (Oxford Graduate Texts)*, Oxford University Press, 2010.

[4] M. Shiga, *Reference Module in Chemistry, Molecular Sciences and Chemical Engineering*, Elsevier, 2018.

TABLE S-9. **Umbrella sampling parameters for PIMD and classical simulations for EG.** In all cases, the umbrella windows along  $\phi_{1c}$  were spaced at  $5^\circ$  intervals between  $0^\circ$  and  $180^\circ$ . Biases of the form  $V_{umb} = \frac{1}{2}K_{umb}(\phi_{1c} - \phi_{1c}^o)^2$  were applied.

- (1) At 300, for both PIMD and classical simulations,  $K_{umb} = 500 \text{ kJ mol}^{-1} \text{ rad}^{-2}$  and the total simulation time  $T_{sim} = 200$  ps. The first 10 ps were discarded.
- (2) At 50 K, for undeuterated simulations, we use  $K = 200 \text{ kJ mol}^{-1} \text{ rad}^{-2}$  and  $T_{sim} = 400$  ps. The first 50 ps were discarded.
- (3) At 50 K, for simulations with monodeuteration (CHOD<sub>9</sub> or CHOD<sub>10</sub>, indicating that only one of the two OH hydrogen is deuterated, while CH hydrogens are not deuterated) or fully deuteration (CDOD, where all 6 H atoms of EG are deuterated), the table below provides the parameters.

The force constant and simulation length in each window were adjusted by trial-and-error to ensure that the distributions of  $\phi_1$  have sufficient overlap between successive windows.

| $\phi_{1c}^o$ | CHOD <sub>9</sub> |           | CHOD <sub>10</sub> |           | CDOD     |           |
|---------------|-------------------|-----------|--------------------|-----------|----------|-----------|
|               | $T_{sim}$         | $K_{umb}$ | $T_{sim}$          | $K_{umb}$ | $t$ (ps) | $K_{umb}$ |
| 0             | 400               | 200       | 400                | 200       | 400      | 200       |
| 5             | 400               | 200       | 400                | 200       | 400      | 200       |
| 10            | 400               | 200       | 400                | 200       | 400      | 200       |
| 15            | 400               | 200       | 400                | 200       | 400      | 200       |
| 20            | 400               | 200       | 400                | 200       | 400      | 200       |
| 25            | 400               | 200       | 400                | 200       | 400      | 200       |
| 30            | 400               | 200       | 400                | 200       | 400      | 200       |
| 35            | 400               | 200       | 400                | 200       | 400      | 200       |
| 40            | 400               | 200       | 400                | 200       | 200      | 200       |
| 45            | 200               | 500       | 200                | 500       | 400      | 200       |
| 50            | 200               | 500       | 200                | 500       | 400      | 200       |
| 55            | 200               | 500       | 200                | 500       | 400      | 200       |
| 60            | 200               | 500       | 200                | 500       | 200      | 500       |
| 65            | 200               | 500       | 200                | 500       | 200      | 500       |
| 70            | 200               | 500       | 200                | 500       | 200      | 500       |
| 75            | 200               | 500       | 200                | 500       | 200      | 500       |
| 80            | 200               | 500       | 200                | 500       | 200      | 500       |
| 85            | 200               | 500       | 200                | 500       | 200      | 500       |
| 90            | 200               | 500       | 200                | 500       | 200      | 500       |
| 95            | 200               | 500       | 200                | 500       | 200      | 500       |
| 100           | 400               | 200       | 400                | 200       | 300      | 200       |
| 105           | 400               | 200       | 400                | 200       | 300      | 200       |
| 110           | 400               | 200       | 400                | 200       | 300      | 200       |
| 115           | 400               | 200       | 400                | 200       | 300      | 200       |
| 120           | 400               | 200       | 400                | 200       | 300      | 200       |
| 125           | 400               | 200       | 400                | 200       | 300      | 200       |
| 130           | 400               | 200       | 400                | 200       | 300      | 200       |
| 135           | 400               | 200       | 400                | 200       | 300      | 200       |
| 140           | 400               | 200       | 400                | 200       | 300      | 200       |
| 145           | 400               | 200       | 400                | 200       | 300      | 200       |
| 150           | 400               | 200       | 400                | 200       | 300      | 200       |
| 155           | 400               | 200       | 400                | 200       | 300      | 200       |
| 160           | 400               | 200       | 400                | 200       | 300      | 200       |
| 165           | 400               | 200       | 400                | 200       | 300      | 200       |
| 170           | 400               | 200       | 400                | 200       | 300      | 200       |
| 175           | 400               | 200       | 400                | 200       | 300      | 200       |
| 180           | 400               | 200       | 400                | 200       | 300      | 200       |

Units:  $T_{sim}$  (ps) and  $K_{umb}$  ( $\text{kJ mol}^{-1} \text{ rad}^{-2}$ )

TABLE S-10. Cartesian coordinates in Å of the key stationary points of EG. See also Fig 2, Table 1 and S-2.

| $tG^+g^-$   |             |             |             | $g^+G^+g^-$ |             |             |             |
|-------------|-------------|-------------|-------------|-------------|-------------|-------------|-------------|
| C1          | -0.67908078 | 0.60205726  | -0.27362755 | C1          | -0.67611587 | 0.59765477  | -0.29206028 |
| C2          | 0.72469313  | 0.56830366  | 0.27769448  | C2          | 0.72024883  | 0.57108646  | 0.28834292  |
| O3          | -1.32495008 | -0.57555101 | 0.21781569  | O3          | -1.38492090 | -0.59624063 | 0.05208896  |
| O4          | 1.43655931  | -0.56564035 | -0.19195041 | O4          | 1.43837835  | -0.56470384 | -0.16288889 |
| H5          | 0.68052290  | 0.57711823  | 1.37094013  | H5          | 0.66413987  | 0.58539774  | 1.38382683  |
| H6          | 1.27495187  | 1.44691413  | -0.05495101 | H6          | 1.27759191  | 1.45074673  | -0.03276779 |
| H7          | -1.19497887 | 1.50332989  | 0.06897088  | H7          | -1.21486713 | 1.48934040  | 0.03874836  |
| H8          | -0.64376873 | 0.59645889  | -1.36524176 | H8          | -0.62351729 | 0.60104693  | -1.37894859 |
| H9          | -2.15854557 | -0.68886187 | -0.24811844 | H9          | -1.62595636 | -0.54048047 | 0.98312216  |
| H10         | 0.87527051  | -1.32759391 | -0.00292353 | H10         | 0.83015171  | -1.31094301 | -0.08527738 |
| $g^-G^+g^-$ |             |             |             | $tTt$       |             |             |             |
| C1          | 0.23677124  | 0.71845818  | 0.59661412  | C1          | -0.43860805 | 0.61464551  | 0.00000000  |
| C2          | -0.23677124 | -0.71845818 | 0.59661412  | C2          | 0.43860805  | -0.61464551 | 0.00000000  |
| O3          | -0.23677124 | 1.42044621  | -0.55063638 | O3          | 0.43860805  | 1.73755717  | -0.00000000 |
| O4          | 0.23677124  | -1.42044621 | -0.55063638 | O4          | -0.43860805 | -1.73755717 | 0.00000000  |
| H5          | -1.32770144 | -0.74728429 | 0.64316954  | H5          | 1.07542778  | -0.60288641 | 0.88744548  |
| H6          | 0.16170162  | -1.23931829 | 1.46711198  | H6          | 1.07542778  | -0.60288641 | -0.88744548 |
| H7          | -0.16170162 | 1.23931829  | 1.46711198  | H7          | -1.07542778 | 0.60288641  | -0.88744548 |
| H8          | 1.32770144  | 0.74728429  | 0.64316954  | H8          | -1.07542778 | 0.60288641  | 0.88744548  |
| H9          | 0.33876887  | 1.18434801  | -1.28487519 | H9          | -0.09546523 | 2.53706794  | 0.00000000  |
| H10         | -0.33876887 | -1.18434801 | -1.28487519 | H10         | 0.09546523  | -2.53706794 | 0.00000000  |
| $g^+Tg^-$   |             |             |             | $tTg^+$     |             |             |             |
| C1          | 0.00084540  | 0.00047103  | -0.75973491 | C1          | -0.56288057 | 0.49881895  | -0.04388636 |
| C2          | -0.00084540 | -0.00047103 | 0.75973491  | C2          | 0.56776065  | -0.50850107 | 0.00412610  |
| O3          | 1.32482151  | -0.00034690 | -1.28249227 | O3          | -1.77604741 | -0.24192692 | 0.04487840  |
| O4          | -1.32482151 | 0.00034690  | 1.28249227  | O4          | 1.83539130  | 0.13223227  | -0.08631595 |
| H5          | 0.58195628  | 0.84730596  | 1.12713764  | H5          | 0.49812648  | -1.17449291 | -0.85297086 |
| H6          | 0.46494364  | -0.91357045 | 1.13067030  | H6          | 0.48165893  | -1.11192475 | 0.91055661  |
| H7          | -0.58195628 | -0.84730596 | -1.12713764 | H7          | -0.46701564 | 1.19918453  | 0.79277498  |
| H8          | -0.46494364 | 0.91357045  | -1.13067030 | H8          | -0.50232098 | 1.06449209  | -0.97623229 |
| H9          | 1.71292989  | -0.86417099 | -1.11018124 | H9          | -2.51333513 | 0.36842286  | -0.04828280 |
| H10         | -1.71292989 | 0.86417099  | 1.11018124  | H10         | 1.99885469  | 0.58996815  | 0.74421639  |
| $g^+Tg^+$   |             |             |             | $tG^+t$     |             |             |             |
| C1          | 0.41206602  | 0.63806280  | -0.02700233 | C1          | -0.65959007 | -0.36221035 | 0.52863732  |
| C2          | -0.41206602 | -0.63806280 | -0.02700233 | C2          | 0.65959007  | 0.36221035  | 0.52863732  |
| O3          | -0.41206602 | 1.79697745  | -0.06550343 | O3          | -0.65959007 | -1.28939345 | -0.55115838 |
| O4          | 0.41206602  | -1.79697745 | -0.06550343 | O4          | 0.65959007  | 1.28939345  | -0.55115838 |
| H5          | -1.02937805 | -0.67137536 | -0.92189689 | H5          | 1.46238479  | -0.37164206 | 0.42146561  |
| H6          | -1.07853908 | -0.65310314 | 0.84245632  | H6          | 0.77764379  | 0.87957610  | 1.48570351  |
| H7          | 1.07853908  | 0.65310314  | 0.84245632  | H7          | -0.77764379 | -0.87957610 | 1.48570351  |
| H8          | 1.02937805  | 0.67137536  | -0.92189689 | H8          | -1.46238479 | 0.37164206  | 0.42146561  |
| H9          | -0.89509515 | 1.85066499  | 0.76548197  | H9          | -1.55608376 | -1.61641367 | -0.66972598 |
| H10         | 0.89509515  | -1.85066499 | 0.76548197  | H10         | 1.55608376  | 1.61641367  | -0.66972598 |
| $tG^+g^+$   |             |             |             | $cCt$       |             |             |             |
| C1          | 0.68494002  | 0.53484283  | 0.30712496  | C1          | -1.02086942 | -0.16099741 | 0.00000000  |
| C2          | -0.69575343 | 0.53939740  | -0.30519031 | C2          | -0.00000000 | 1.00374486  | 0.00000000  |
| O3          | 1.40943629  | -0.56874882 | -0.21745027 | O3          | -0.40959107 | -1.43858726 | -0.00000000 |
| O4          | -1.48644341 | -0.58149220 | 0.06042556  | O4          | 1.31185414  | 0.43778116  | -0.00000000 |
| H5          | -0.60467784 | 0.49424425  | -1.38897474 | H5          | -0.13798173 | 1.62481738  | 0.88597615  |
| H6          | -1.19168896 | 1.47870341  | -0.03897876 | H6          | -0.13798173 | 1.62481738  | -0.88597615 |
| H7          | 1.17430907  | 1.48351373  | 0.06193987  | H7          | -1.65892827 | -0.08154458 | 0.88113468  |
| H8          | 0.60218806  | 0.46704051  | 1.39835001  | H8          | -1.65892827 | -0.08154458 | -0.88113468 |
| H9          | 2.27905417  | -0.58392669 | 0.19348032  | H9          | 0.54490025  | -1.28790347 | -0.00000000 |
| H10         | -1.57824704 | -0.58308836 | 1.01877310  | H10         | 1.95603178  | 1.15132195  | -0.00000000 |



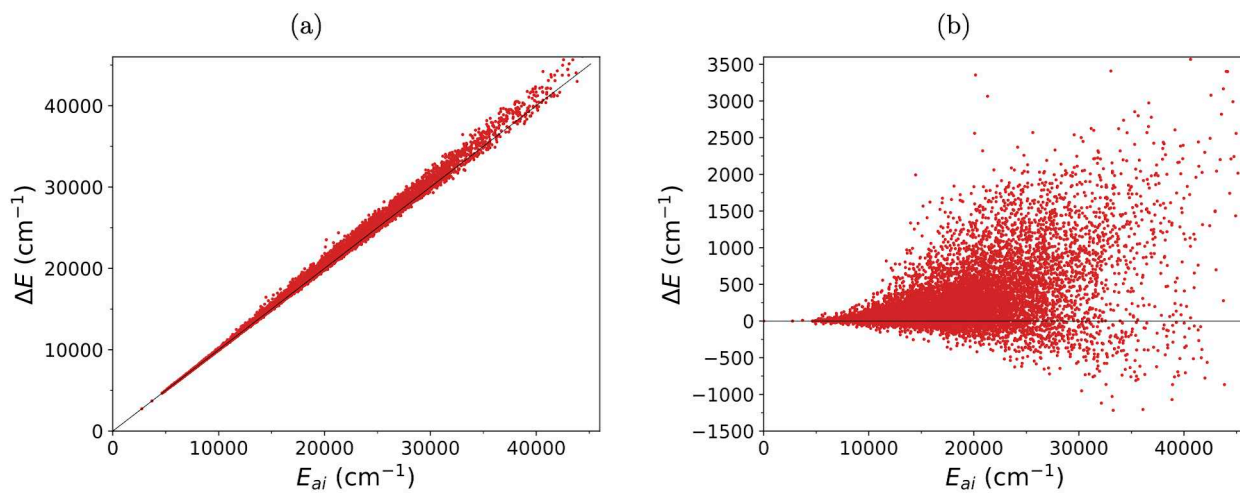

FIG. S-1. Comparison of ab initio MP2/aVTZ energies with the PES for EG truncated to quartic terms in  $V_b$ . The plots indicate large deviations at high energies, indicating the importance of including the higher order terms in the PES.

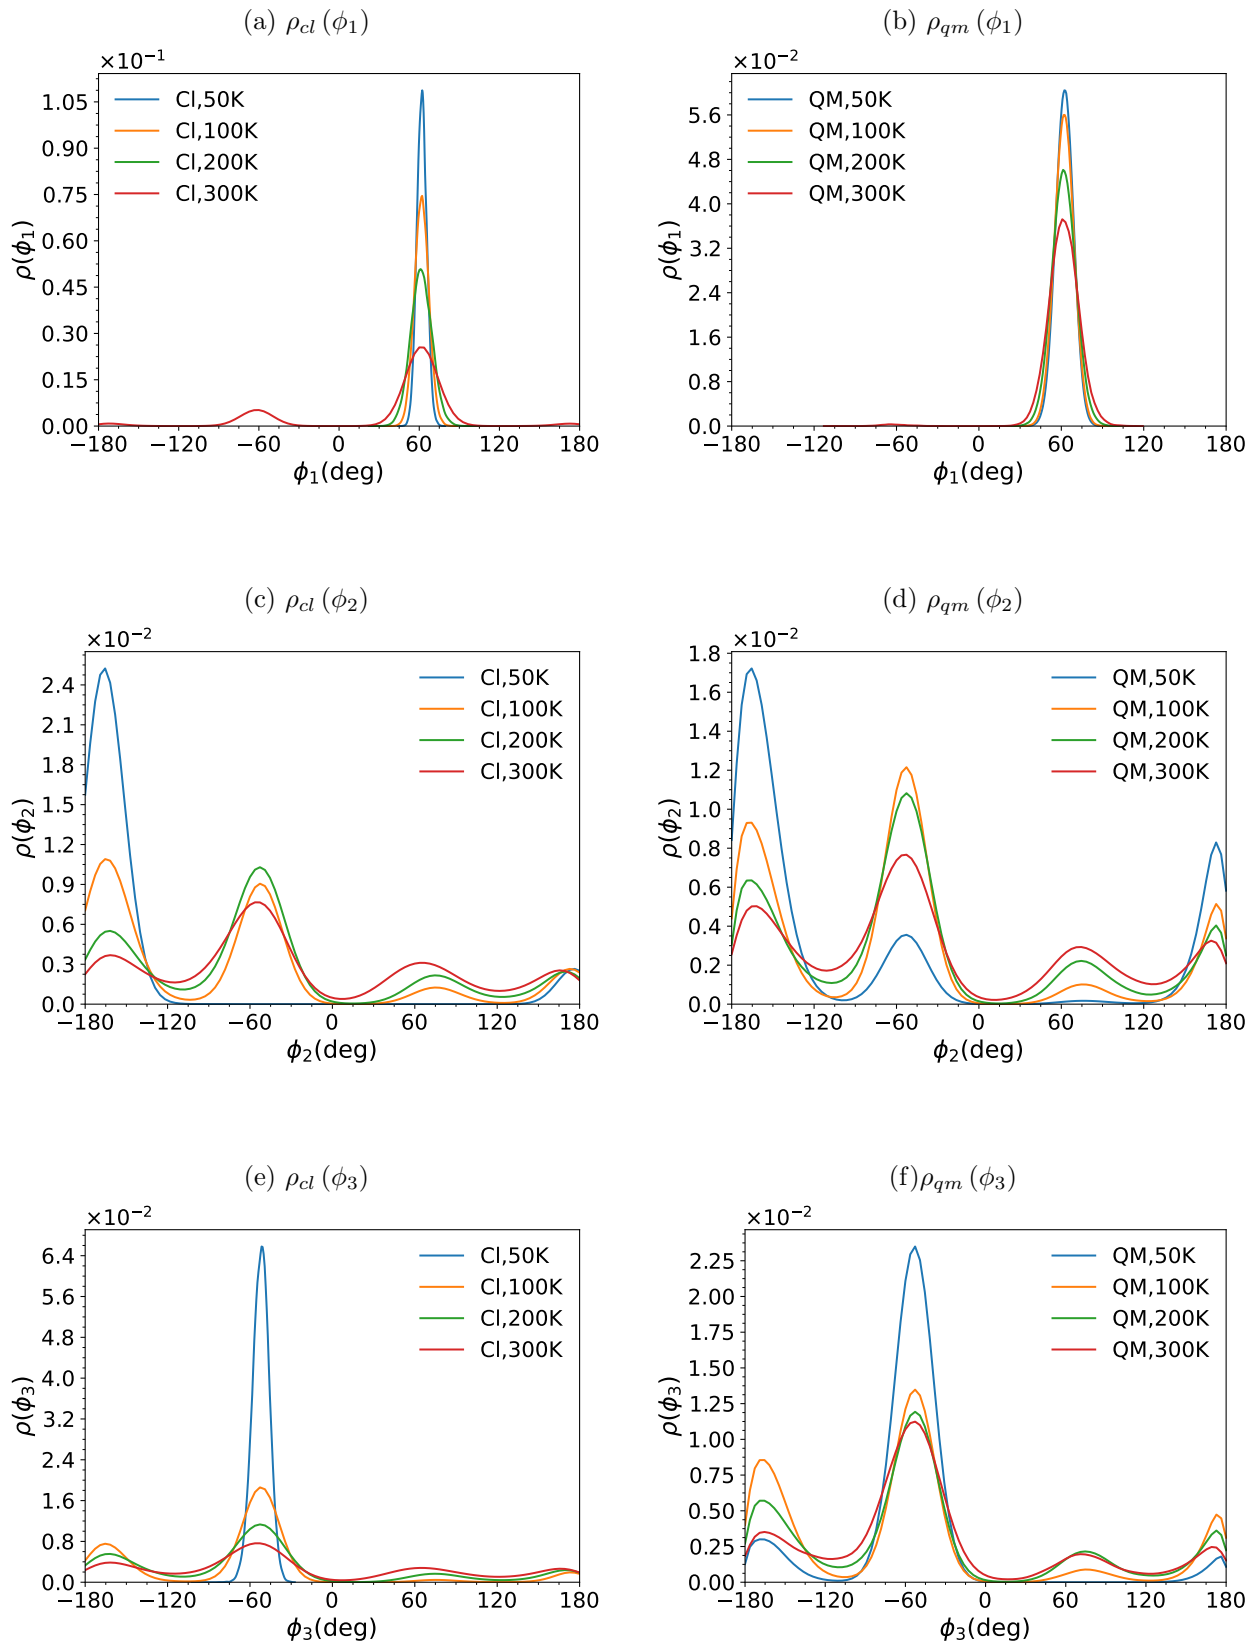

FIG. S-2. One-dimensional distributions of OCCO ( $\phi_1$ ) and the two CCOH ( $\phi_2, \phi_3$ ) dihedrals from (a, c, e) classical and (b, d, f) PIMD simulations of EG at various temperatures.

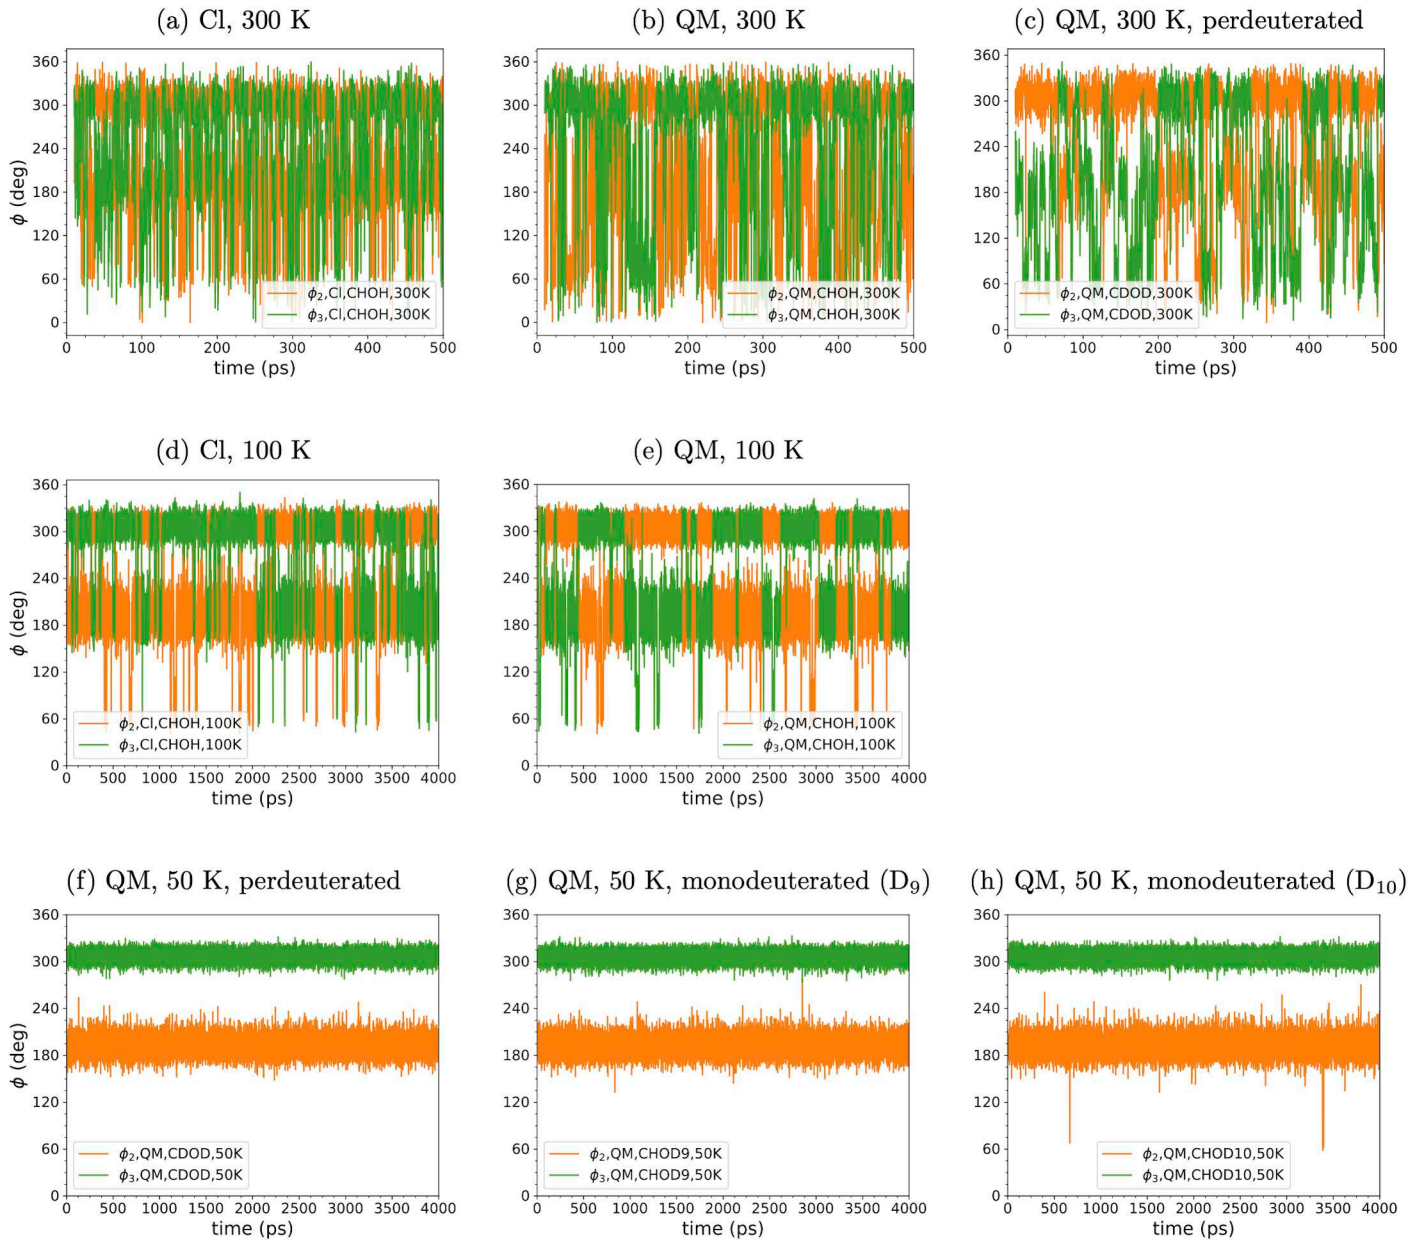

FIG. S-3. Plots of  $\phi_2$  and  $\phi_3$  with time from classical and PIMD simulations at (a, b, c) 300 K, (d, e) 100 K, and (f, g, h) 50 K. Only where indicated above a plot, the simulations are with perdeuteration (all six H atoms replaced with D) or monodeuteration (either H<sub>9</sub> or H<sub>10</sub> of the OH groups replaced with D). Note that the 300 K plots are shown only up to 500 ps, as the dynamics is vigorous. Plots for other temperatures are shown up to 4 ns.

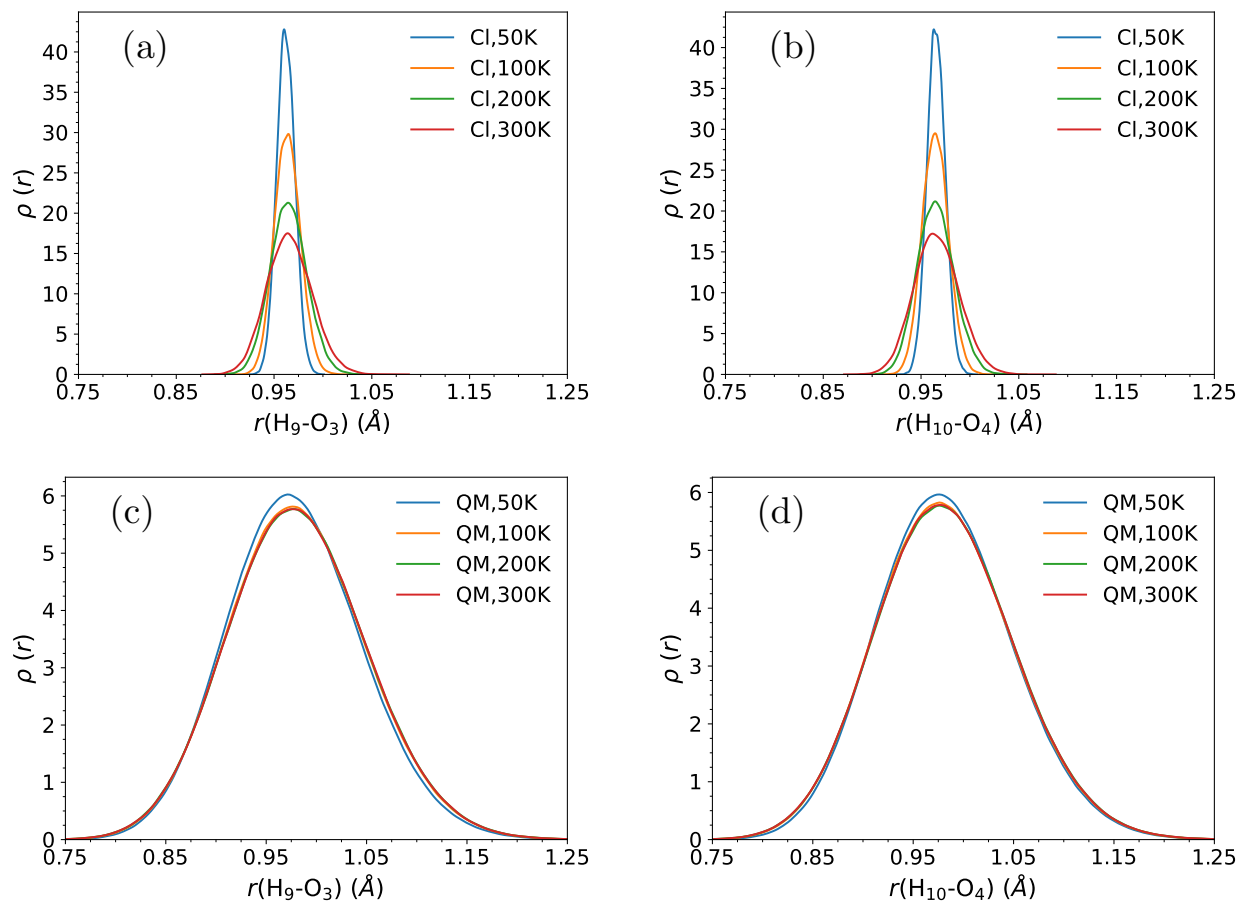

FIG. S-4. Distributions of (a, c)  $\text{H}_9\text{-O}_3$  and (b, d)  $\text{H}_{10}\text{-O}_4$  distances from (a, b) classical and (c, d) PIMD simulations of EG at various temperatures.

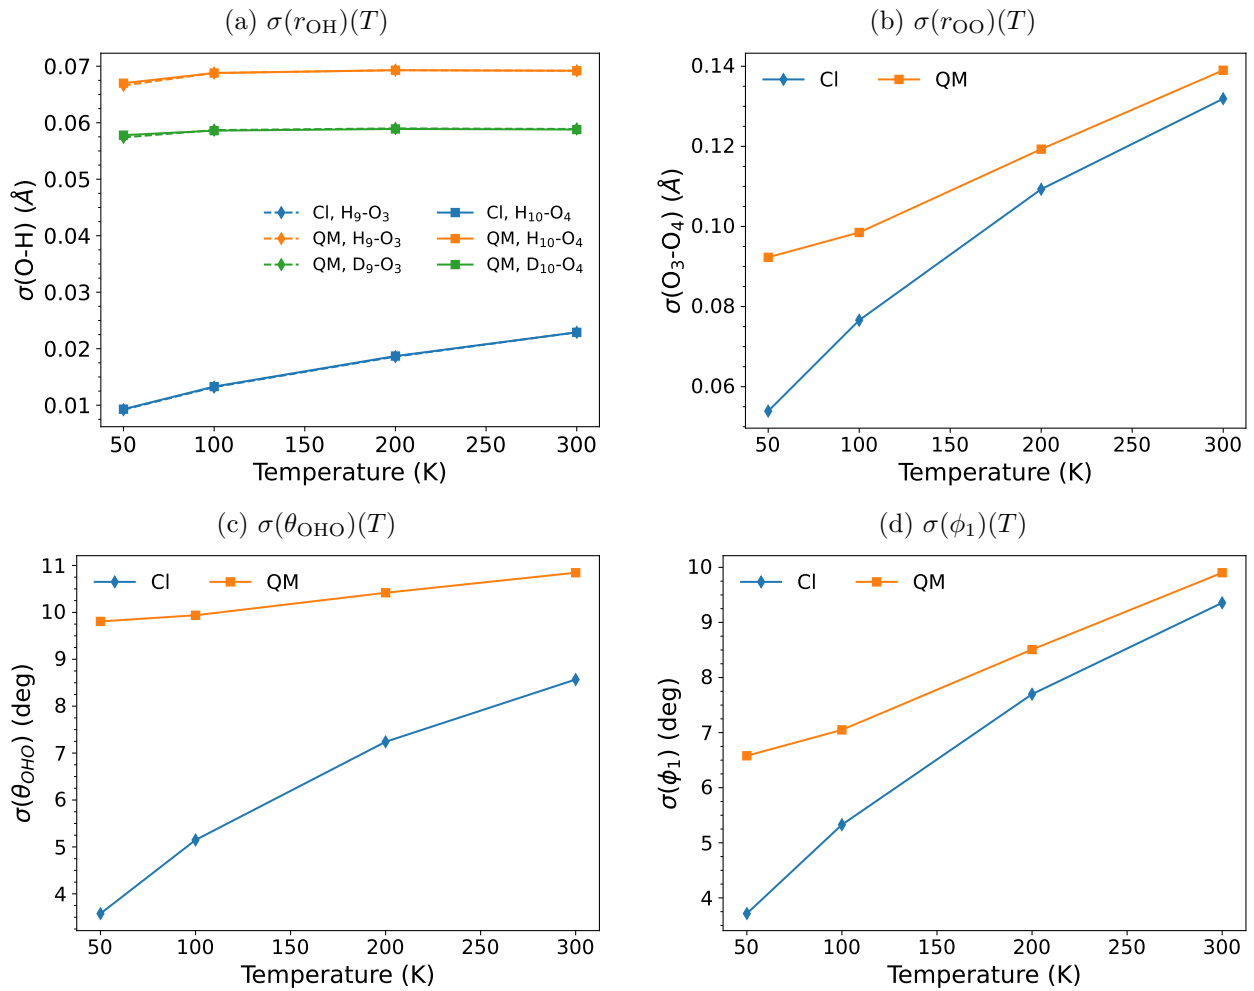

FIG. S-5. Trends of standard deviations ( $\sigma$ ) of various internal coordinate distributions with temperature from classical and PIMD simulations. (a) Standard deviations of  $r_{\text{OH}}$  distributions from classical (blue), orange (PIMD) and green (PIMD, perdeuterated) simulation. The solid and dashed lines indicate the two different OH bonds. Standard deviations of the distributions of (b) O-O distances, (c) 'inner' O-H-O angles, and (d) OCCO ( $\phi_1$ ) dihedrals with temperature. Again, blue/orange trends are from classical/PIMD simulations.

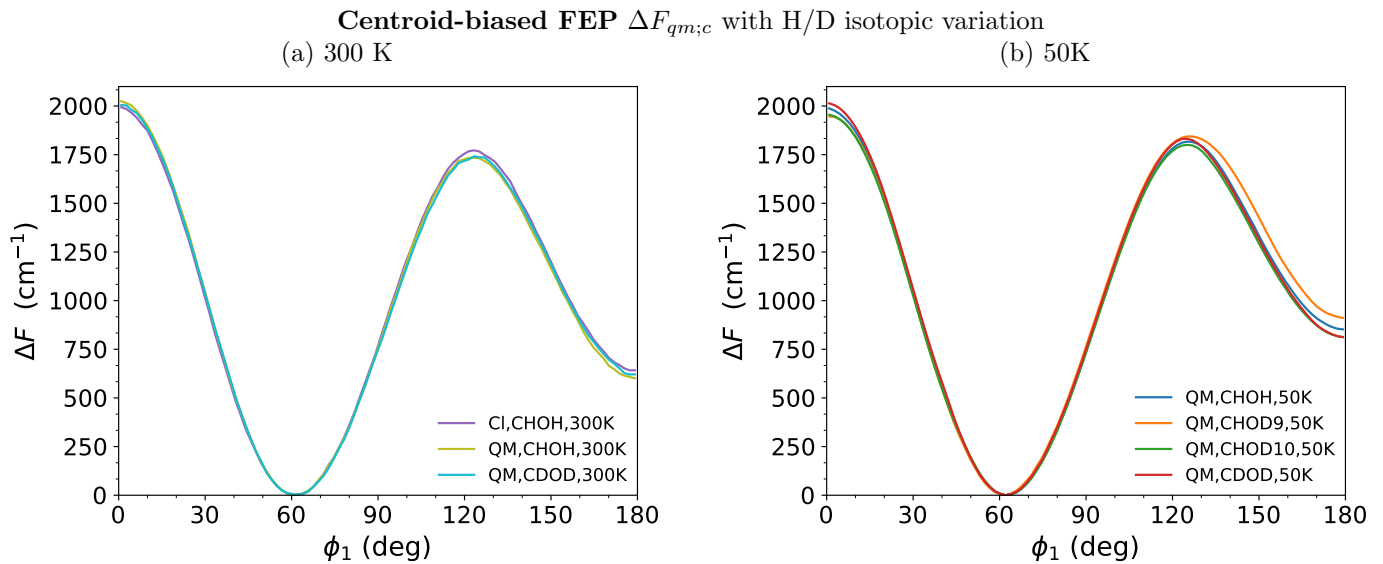

(c) **Bead-biased FEP  $\Delta F_{qm;b}$**   
with H/D isotopic variation at 300 K and 50 K

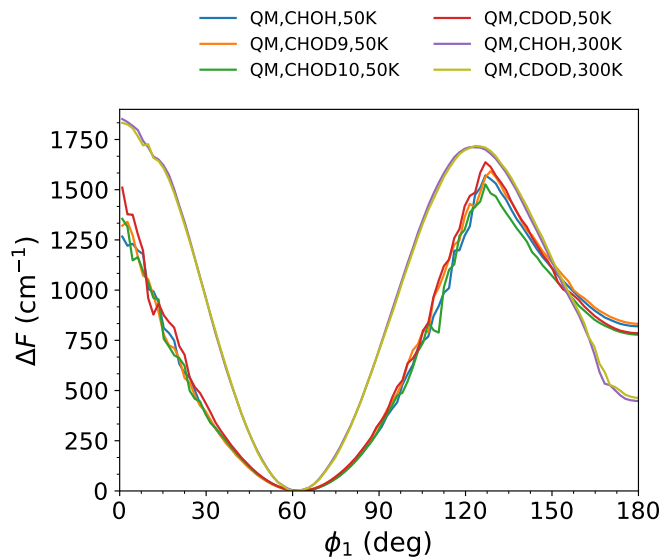

FIG. S-6. Additional free energy profiles for EG. (a) Centroid-biased free energy profiles,  $\Delta F_{qm;c}(\phi_1) = F_{qm,c}(\phi_1) - F_{qm,c}^{min}$ , at 300 K obtained by path integral umbrella sampling simulations along  $\phi_1$ , both without and with deuteration. Classical simulation results are shown alongside. (b) Same as (a) but at 50 K. (c) Variation of  $\Delta F_{qm;b}(\phi_1)$  without and with H/D isotopic substitution at both 50 K and 300 K. *Legend notation:* CHOH  $\equiv$  no isotopic substitution. CHOD9 and CHOD10  $\equiv$  monodeuteration (D<sub>9</sub> and D<sub>10</sub>, respectively); see Fig. 1 for atom numbering. CDOD  $\equiv$  perdeuteration.

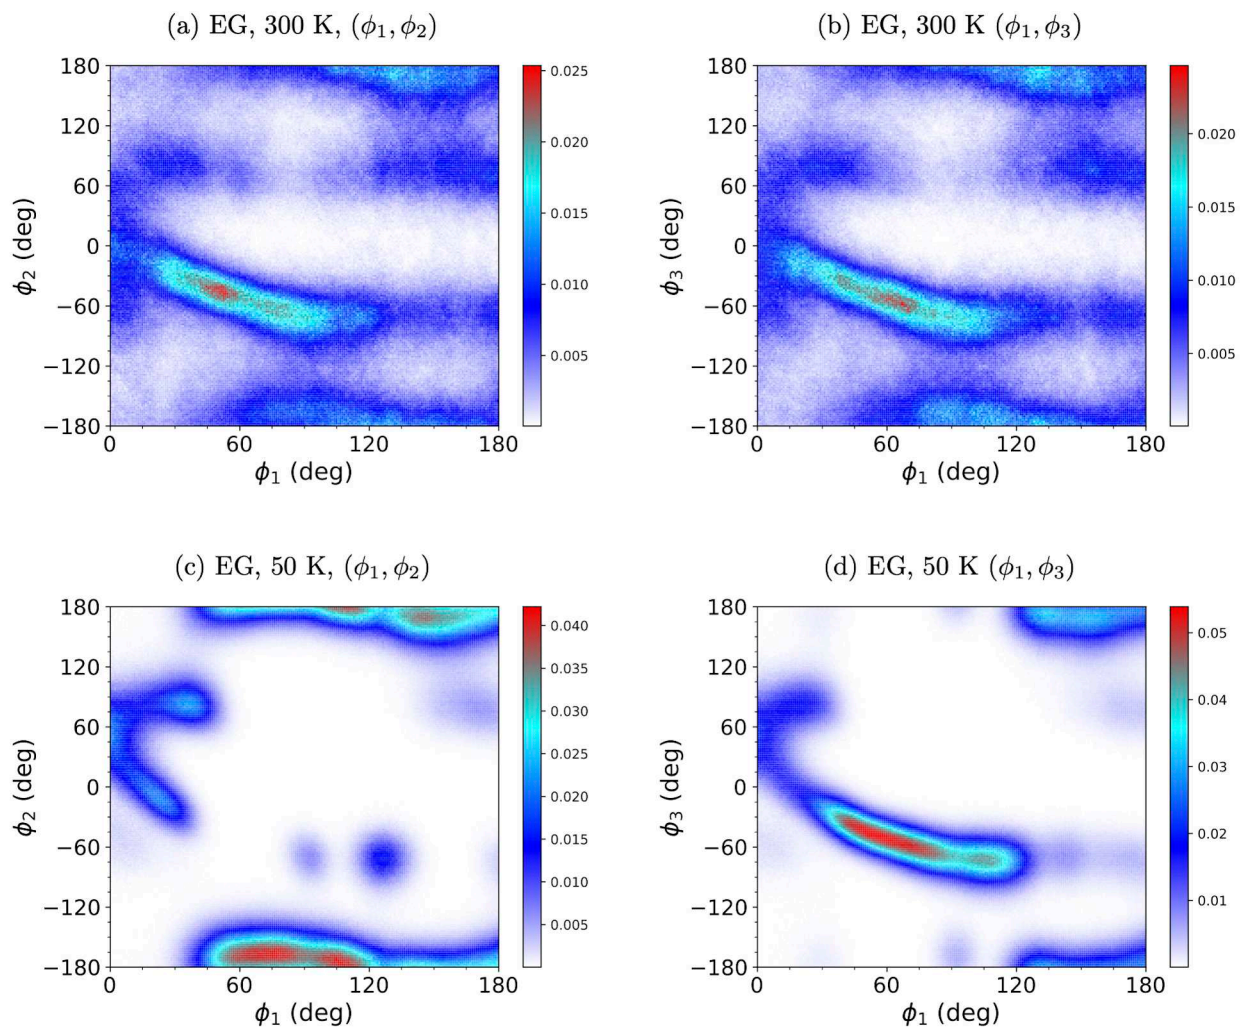

FIG. S-7. Distribution of centroid  $(\phi_1, \phi_2, \phi_3)$  values obtained via umbrella sampling simulations along the OCCO dihedral  $\phi_1$  at both 50 K and 300 K for undeuterated EG.

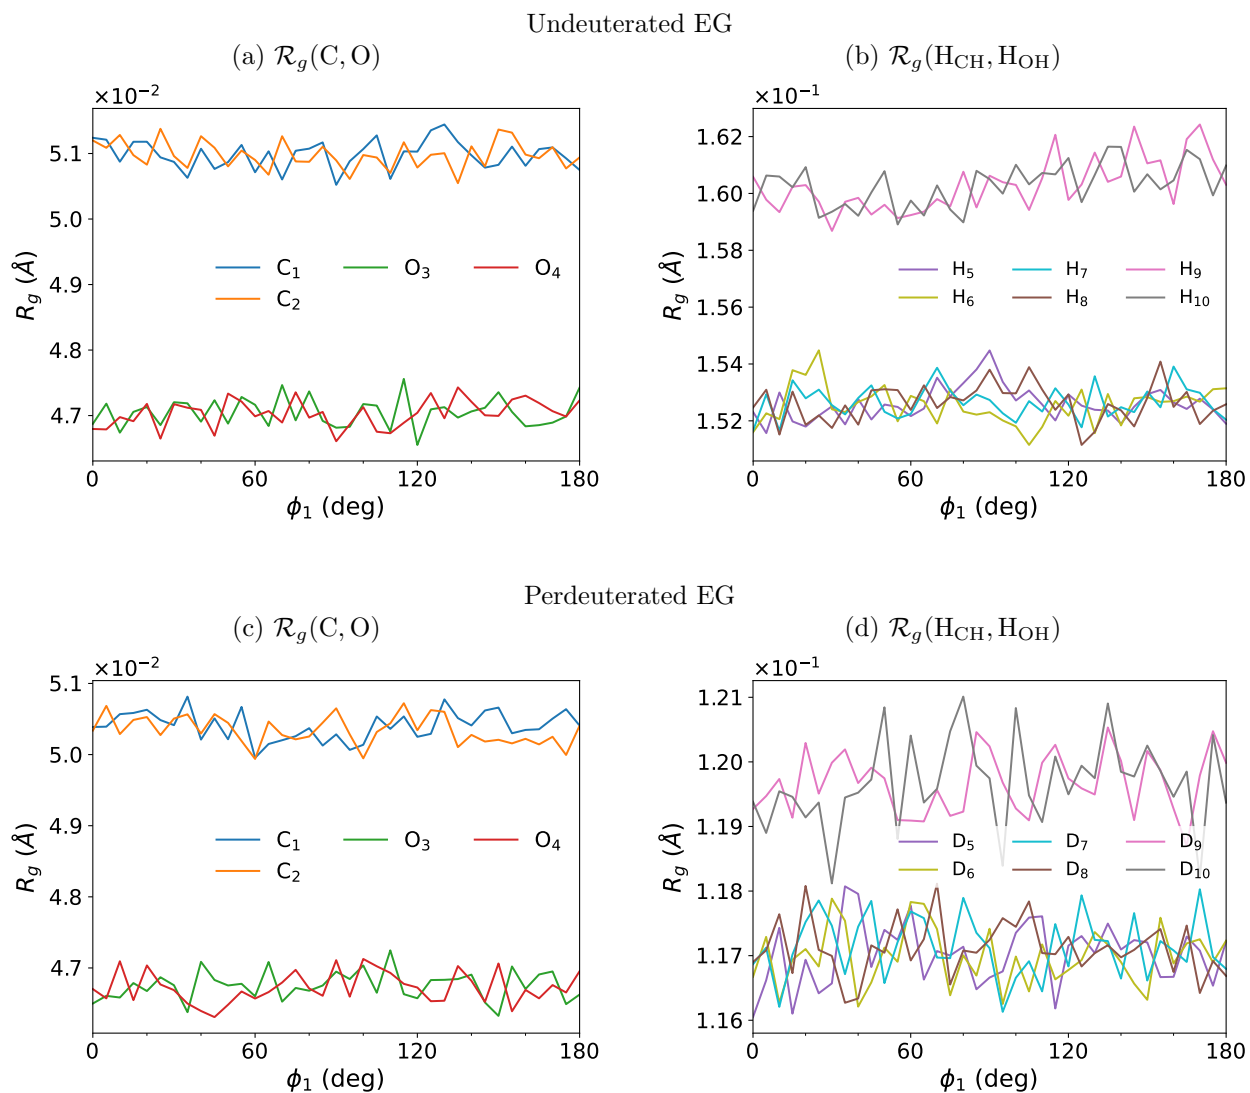

FIG. S-8. Mean radii of gyration  $\mathcal{R}_g$  of atoms in undeuterated and deuterated EG at 300 K as a function of  $\phi_1$ . See Fig. 1 for the atom numbers.



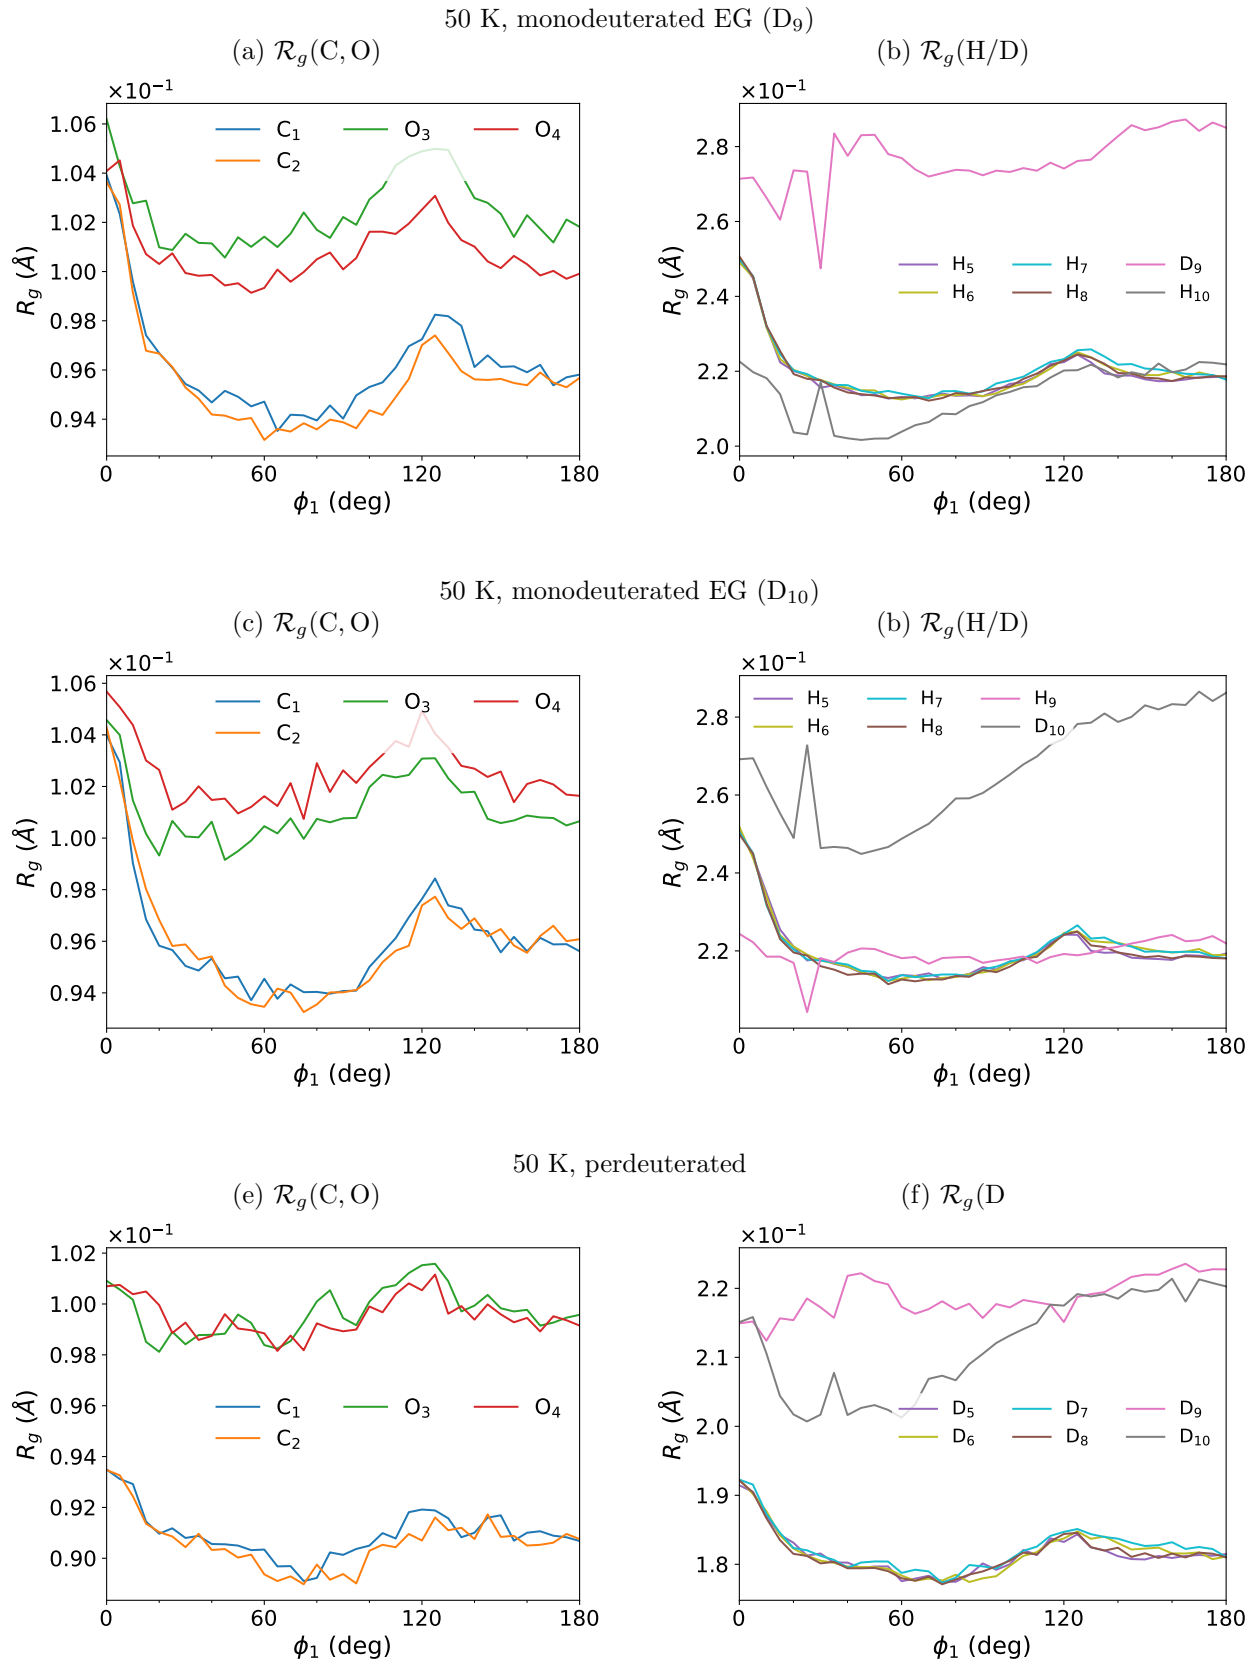

FIG. S-9. Mean radii of gyration  $\mathcal{R}_g$  of atoms in deuterated EG at 50 K as a function of  $\phi_1$ . See Fig. 1 for the atom numbers.

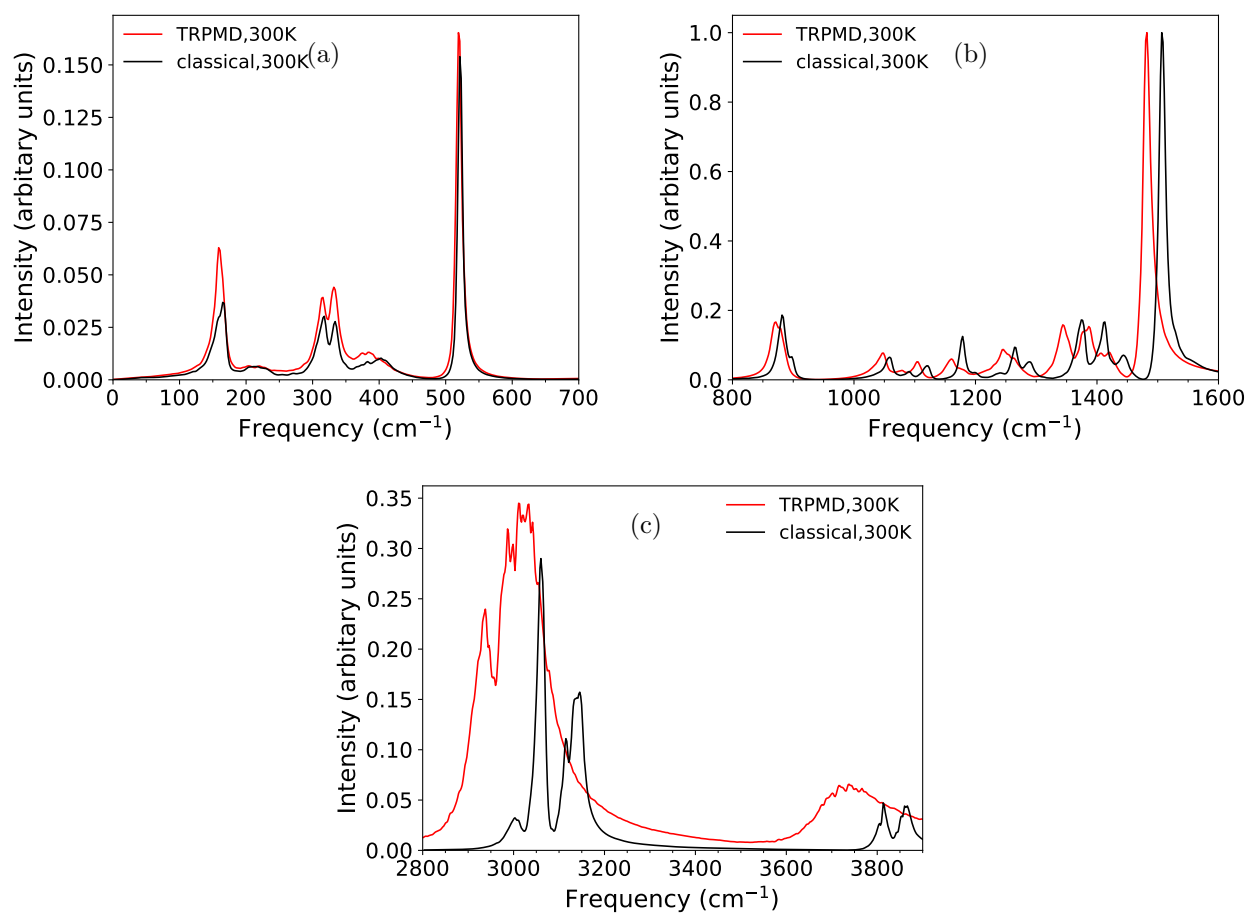

FIG. S-10. Comparison of classical and T-RPMD power spectra at 300 K.
